# Supplementary material for: Radiation dosimetry of the α4β2 nicotinic receptor ligand (+)-[18F]flubatine, comparing preclinical PET/MRI and PET/CT to first-in-human PET/CT results
Source: PubMed Central journal article supplement (PMC5074934; doi:10.1186/s40658-016-0160-5), 2016-10-21
Supplement: 40658_2016_160_MOESM1_ESM.pdf [file 40658_2016_160_MOESM1_ESM.pdf]

SUPPLEMENTAL MATERIAL FOR MANUSCRIPT:

**“Radiation Dosimetry of the  $\alpha_4\beta_2$  Nicotinic Receptor Ligand (+)-[ $^{18}\text{F}$ ]Flubatine, Comparing Preclinical PET/MRI and PET/CT to First-in-Human PET/CT Results”**

Mathias Kranz, Bernhard Sattler, Solveig Tiepolt, Stephan Wilke Winnie Deuther-Conrad, Cornelius K. Donat, Steffen Fischer, Marianne Patt, Andreas Schildan, Jörg Patt, René Smits, Alexander Hoepping, Jörg Steinbach, Osama Sabri, Peter Brust

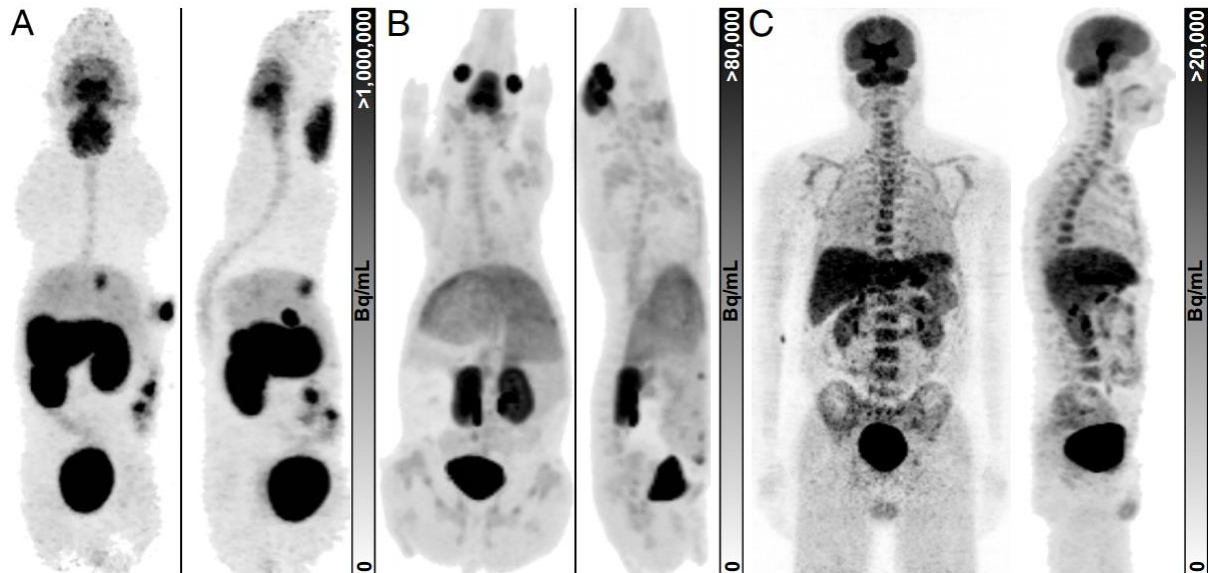

**Figure S1.** PET images (maximum intensity projection, MIP) 1h p.i. of a (A) mouse (29.7 g), (B) piglet (14.0 kg) and (C) human (77 kg). The accumulation in the brain, liver, urinary bladder, red marrow and the intestines can be clearly identified in all three species. Compared with humans there is an additional tracer uptake in the salivary gland in mice and in the eyes in piglets

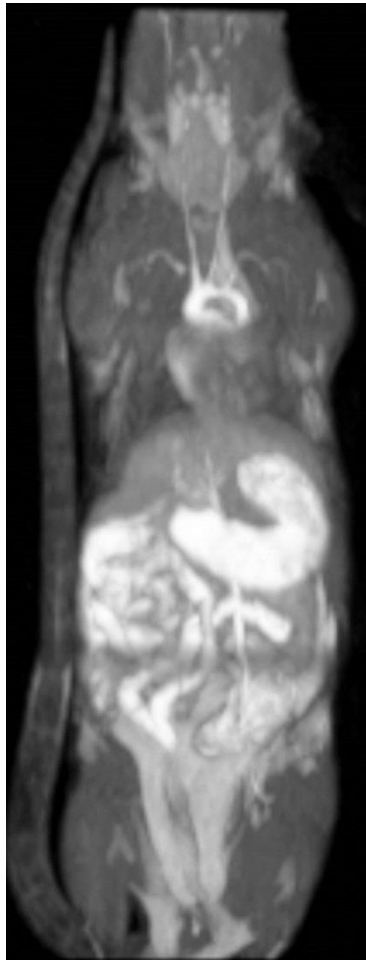

**Figure S2.**  $T_1$  weighted gradient echo sequence (TR= 20 ms; TE= 3.2 ms; MIP) of a mouse. The high soft tissue contrast in the MRI allows for clear organ delineation. The heart, stomach, large intestines, small intestines, liver and the coronary vessels can be clearly identified. Furthermore, a map of linear attenuation coefficients was segmented (soft tissue and air) from this image for scatter- and attenuation correction

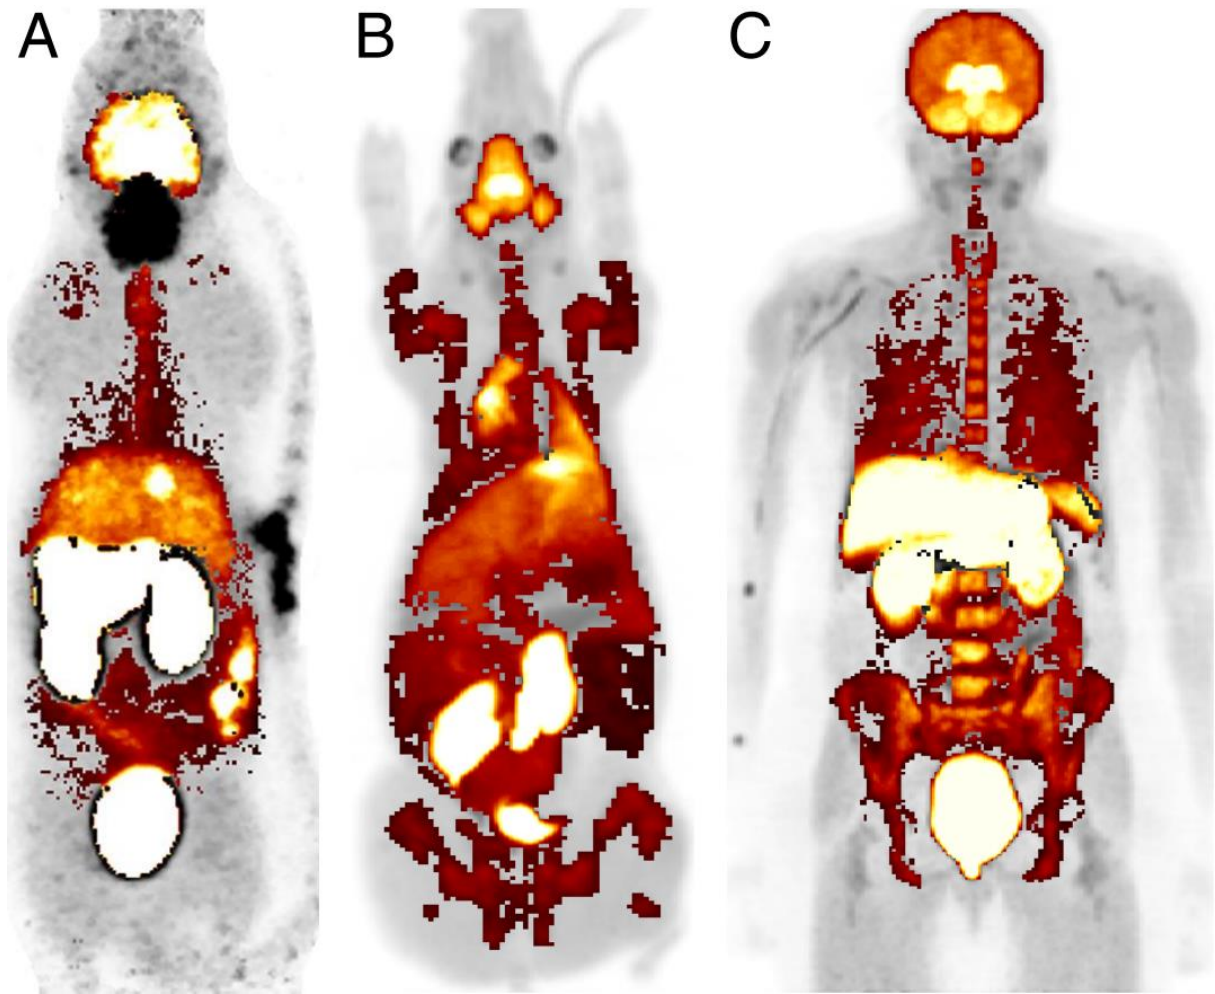

**Figure S3.** Exemplary PET images (MIP) of a mouse (A), piglet (B) and a female human (C) with VOIs highlighted

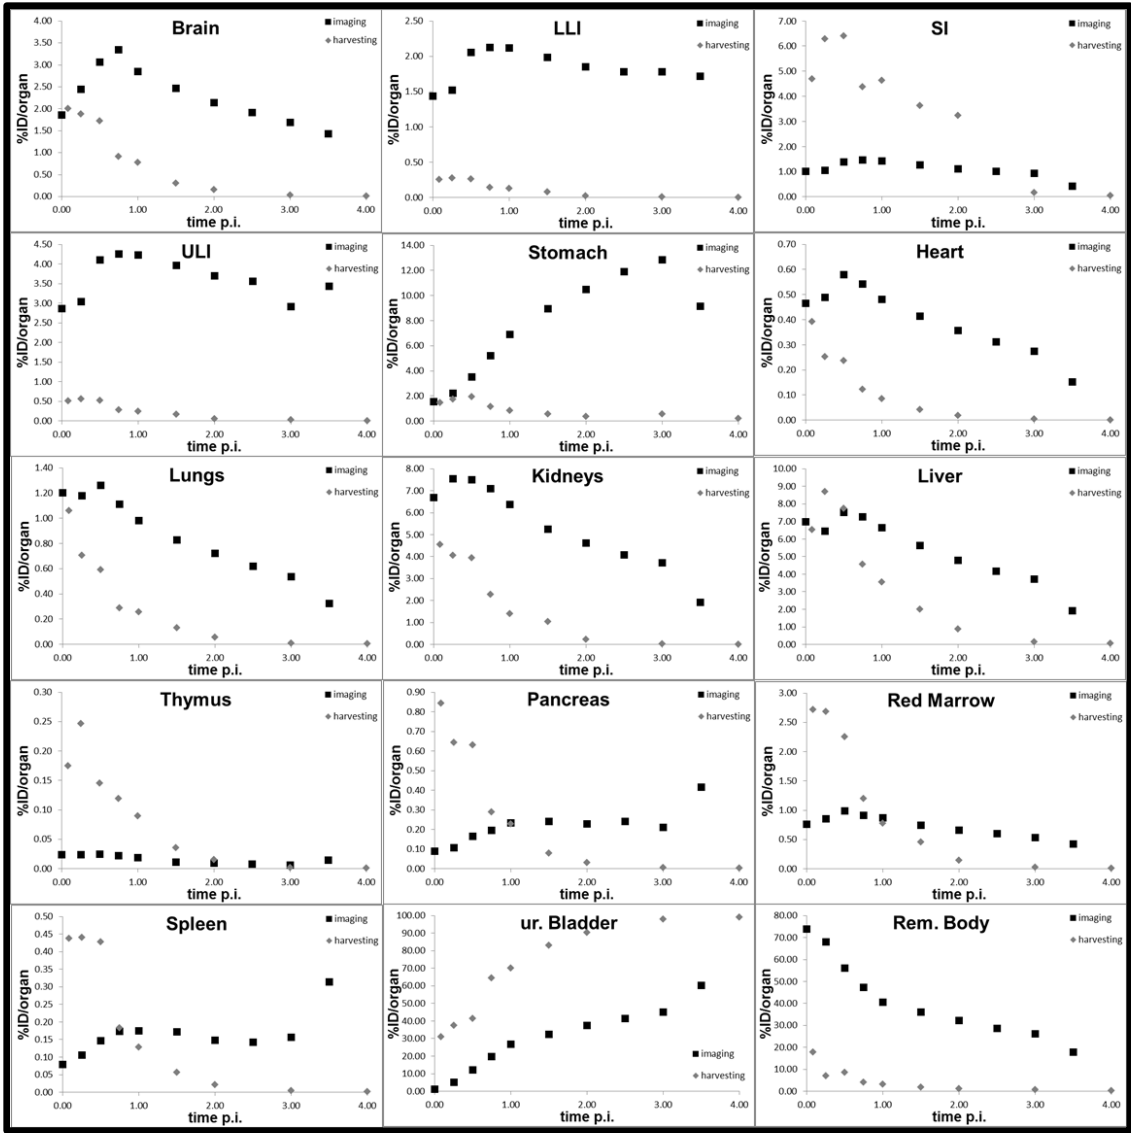

Figure S4. Organ by organ comparison of the mice imaging ((+)-[<sup>18</sup>F]flubatine) vs. organ harvesting ((-)-[<sup>18</sup>F]flubatine) method (mean %ID).

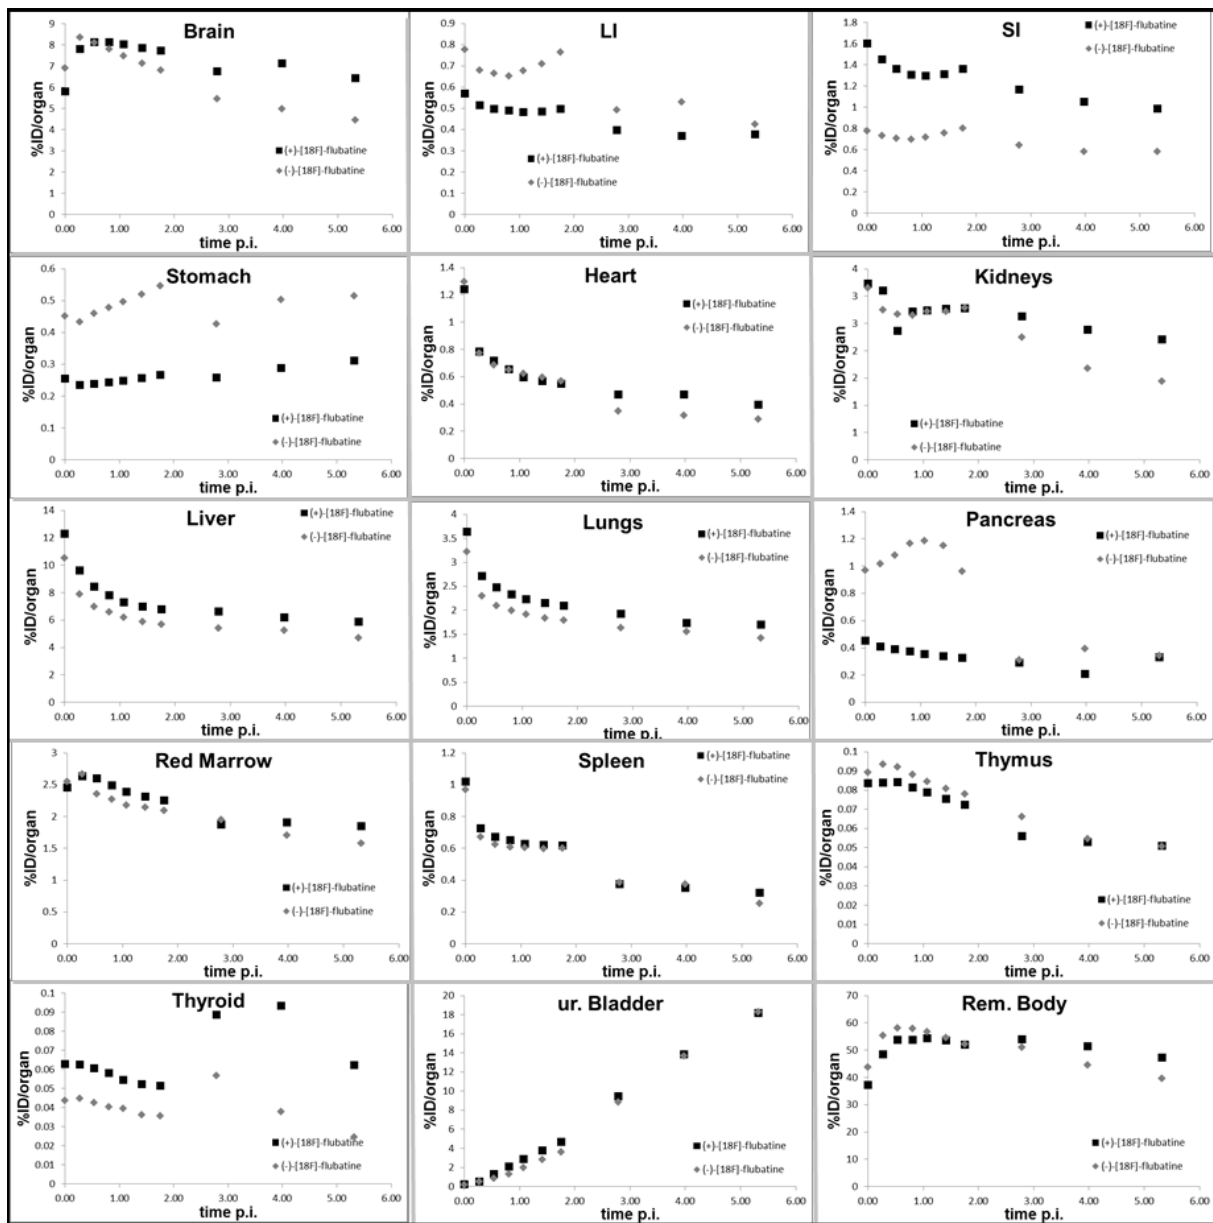

Figure S5. Organ by organ comparison of the piglet imaging method after application of (-)- and (+)-[<sup>18</sup>F]flubatine (mean %ID).

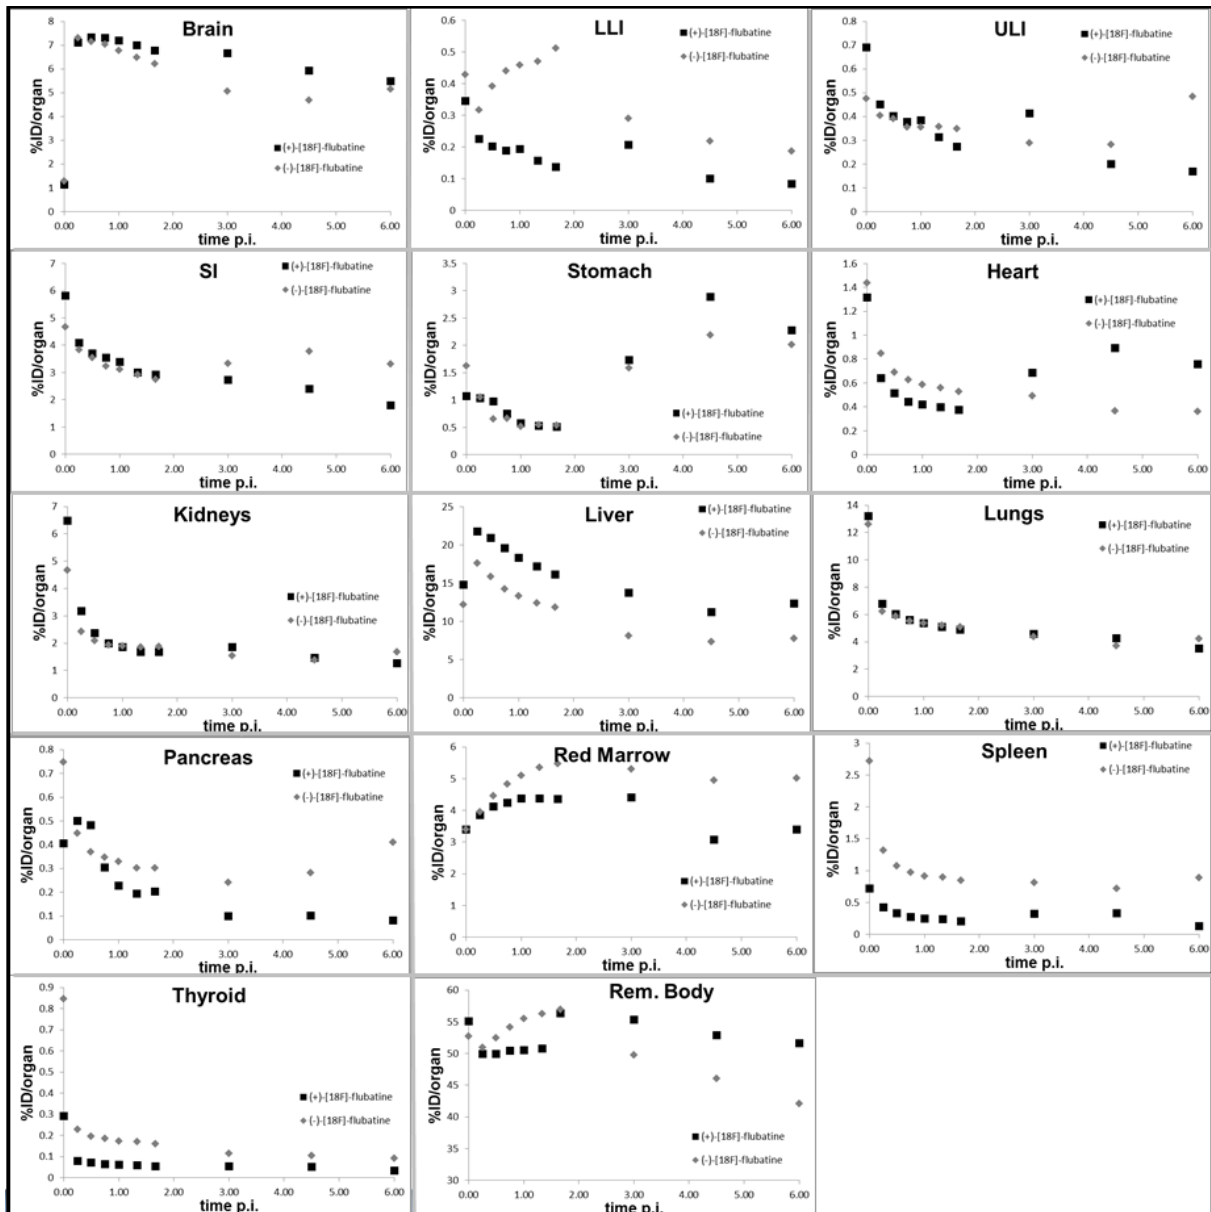

Figure S6. Organ by organ comparison of the human imaging method after application of (-)- and (+)-[<sup>18</sup>F]flubatine (mean %ID).

| Time <sub>animal</sub> [h] | Time <sub>human</sub> [h] | Brain              |                     | LLI                |                     | SI                 |                     | Stomach            |                     | ULI                |                     |                    |
|----------------------------|---------------------------|--------------------|---------------------|--------------------|---------------------|--------------------|---------------------|--------------------|---------------------|--------------------|---------------------|--------------------|
|                            |                           | Modell             |                     | animal             | human               | animal             | human               | animal             | human               | animal             | human               |                    |
|                            |                           | %ID/organ          | %ID/organ           | %ID/organ          | %ID/organ           | %ID/organ          | %ID/organ           | %ID/organ          | %ID/organ           | %ID/organ          | %ID/organ           |                    |
| 0.00                       | 0.00                      | 1.86               | 1.58                | 1.43               | 0.66                | 1.01               | 0.39                | 1.53               | 0.16                | 2.87               | 0.98                |                    |
| 0.25                       | 1.75                      | 2.45               | 2.18                | 1.52               | 0.70                | 1.04               | 0.39                | 2.20               | 0.23                | 3.04               | 1.04                |                    |
| 0.50                       | 3.51                      | 3.06               | 2.87                | 2.05               | 0.83                | 1.39               | 0.58                | 3.51               | 0.39                | 4.11               | 1.23                |                    |
| 0.75                       | 5.26                      | 3.34               | 3.07                | 2.13               | 0.83                | 1.46               | 0.65                | 5.21               | 0.60                | 4.25               | 1.23                |                    |
| 1.00                       | 7.01                      | 2.85               | 2.71                | 2.11               | 0.79                | 1.41               | 0.63                | 6.91               | 0.84                | 4.23               | 1.17                |                    |
| 1.50                       | 10.52                     | 2.47               | 2.35                | 1.98               | 0.76                | 1.25               | 0.56                | 8.94               | 1.12                | 3.97               | 1.13                |                    |
| 2.00                       | 14.02                     | 2.14               | 2.07                | 1.85               | 0.69                | 1.10               | 0.50                | 10.48              | 1.36                | 3.69               | 1.03                |                    |
| 2.50                       | 17.53                     | 1.91               | 1.87                | 1.78               | 0.65                | 1.00               | 0.47                | 11.88              | 1.58                | 3.56               | 0.96                |                    |
| 3.00                       | 21.03                     | 1.69               | 1.67                | 1.78               | 0.64                | 0.93               | 0.44                | 12.85              | 1.75                | 2.91               | 0.87                |                    |
| 3.50                       | 24.54                     | 1.42               | 0.93                | 1.72               | 1.29                | 0.42               | 0.05                | 9.13               | 1.17                | 3.43               | 1.93                |                    |
|                            | Heart                     |                    | Kidneys             |                    | Liver               |                    | Lungs               |                    | Pancreas            |                    | Red Marrow          |                    |
|                            | animal<br>%ID/organ       | human<br>%ID/organ | animal<br>%ID/organ | human<br>%ID/organ | animal<br>%ID/organ | human<br>%ID/organ | animal<br>%ID/organ | human<br>%ID/organ | animal<br>%ID/organ | human<br>%ID/organ | animal<br>%ID/organ | human<br>%ID/organ |
| 0.47                       | 0.16                      | 6.69               | 2.33                | 6.99               | 4.58                | 1.20               | 0.66                | 0.09               | 0.08                | 0.76               | 0.51                |                    |
| 0.49                       | 0.17                      | 7.55               | 2.67                | 6.44               | 4.45                | 1.18               | 0.65                | 0.11               | 0.08                | 0.86               | 0.62                |                    |
| 0.58                       | 0.21                      | 7.50               | 2.80                | 7.52               | 5.39                | 1.26               | 0.68                | 0.16               | 0.12                | 0.99               | 0.79                |                    |
| 0.54                       | 0.19                      | 7.08               | 2.68                | 7.25               | 5.25                | 1.11               | 0.60                | 0.19               | 0.14                | 0.91               | 0.73                |                    |
| 0.48                       | 0.17                      | 6.37               | 2.43                | 6.65               | 4.79                | 0.98               | 0.53                | 0.23               | 0.16                | 0.87               | 0.71                |                    |
| 0.41                       | 0.15                      | 5.25               | 2.00                | 5.63               | 4.00                | 0.83               | 0.44                | 0.24               | 0.15                | 0.75               | 0.61                |                    |
| 0.36                       | 0.13                      | 4.62               | 1.76                | 4.79               | 3.39                | 0.72               | 0.38                | 0.23               | 0.14                | 0.66               | 0.55                |                    |
| 0.31                       | 0.11                      | 4.07               | 1.55                | 4.17               | 2.91                | 0.62               | 0.33                | 0.24               | 0.15                | 0.60               | 0.50                |                    |
| 0.27                       | 0.10                      | 3.72               | 1.55                | 3.72               | 2.56                | 0.54               | 0.28                | 0.21               | 0.12                | 0.54               | 0.45                |                    |
| 0.15                       | 0.05                      | 1.91               | 0.72                | 1.91               | 1.78                | 0.32               | 0.21                | 0.42               | 0.17                | 0.42               | 0.17                |                    |
|                            | Spleen                    |                    | Thymus              |                    | Thyroid             |                    | ur. Bladder         |                    | Rem. of. Body       |                    |                     |                    |
|                            | animal<br>%ID/organ       | human<br>%ID/organ | animal<br>%ID/organ | human<br>%ID/organ | animal<br>%ID/organ | human<br>%ID/organ | animal<br>%ID/organ | human<br>%ID/organ | animal<br>%ID/organ | human<br>%ID/organ |                     |                    |
| 0.08                       | 0.18                      | 0.02               | 0.01                | 0.03               | 0.01                | 1.05               | 0.17                | 73.89              | 86.18               |                    |                     |                    |
| 0.11                       | 0.24                      | 0.02               | 0.01                | 0.04               | 0.02                | 5.14               | 0.81                | 67.88              | 79.14               |                    |                     |                    |
| 0.15                       | 0.32                      | 0.02               | 0.01                | 0.07               | 0.03                | 12.24              | 1.84                | 55.98              | 65.36               |                    |                     |                    |
| 0.17                       | 0.38                      | 0.02               | 0.01                | 0.08               | 0.03                | 19.67              | 2.85                | 47.24              | 55.17               |                    |                     |                    |
| 0.17                       | 0.38                      | 0.02               | 0.01                | 0.09               | 0.03                | 26.80              | 3.79                | 40.48              | 47.28               |                    |                     |                    |
| 0.17                       | 0.37                      | 0.01               | 0.00                | 0.09               | 0.03                | 32.43              | 4.59                | 36.11              | 42.07               |                    |                     |                    |
| 0.15                       | 0.32                      | 0.01               | 0.00                | 0.07               | 0.02                | 37.43              | 5.24                | 32.11              | 37.37               |                    |                     |                    |
| 0.14                       | 0.30                      | 0.01               | 0.00                | 0.07               | 0.02                | 41.37              | 5.74                | 28.59              | 33.27               |                    |                     |                    |
| 0.16                       | 0.32                      | 0.01               | 0.00                | 0.06               | 0.02                | 44.92              | 6.19                | 26.04              | 30.29               |                    |                     |                    |
| 0.31                       | 0.60                      | 0.01               | 0.00                | 0.02               | 0.01                | 60.21              | 9.88                | 17.71              | 21.38               |                    |                     |                    |

Table S1. Mouse biokinetic small animal PET/MR based data and extrapolation to human circumstances in %ID per organ (mean %ID).

| Modell                     |                           | Brain               |                    | SI                  |                    | Stomach             |                    | ULI (2/3 of LI)     |                    | Heart               |                    |
|----------------------------|---------------------------|---------------------|--------------------|---------------------|--------------------|---------------------|--------------------|---------------------|--------------------|---------------------|--------------------|
| Time <sub>animal</sub> [h] | Time <sub>human</sub> [h] | animal<br>%ID/organ | human<br>%ID/organ | animal<br>%ID/organ | human<br>%ID/organ | animal<br>%ID/organ | human<br>%ID/organ | animal<br>%ID/organ | human<br>%ID/organ | animal<br>%ID/organ | human<br>%ID/organ |
| 9.00                       | 0.0                       | 1.2                 | 5.8                | 9.6                 | 1.6                | 5.4                 | 0.3                | 7.2                 | 0.6                | 0.9                 | 1.2                |
| 9.00                       | 0.3                       | 1.6                 | 7.8                | 8.8                 | 1.4                | 5.0                 | 0.2                | 6.4                 | 0.5                | 0.5                 | 0.8                |
| 9.00                       | 0.6                       | 1.7                 | 8.1                | 8.3                 | 1.4                | 5.0                 | 0.2                | 6.2                 | 0.5                | 0.5                 | 0.7                |
| 9.00                       | 0.8                       | 1.7                 | 8.1                | 8.0                 | 1.3                | 5.1                 | 0.2                | 6.1                 | 0.5                | 0.5                 | 0.7                |
| 12.00                      | 1.1                       | 1.7                 | 8.0                | 8.0                 | 1.3                | 5.2                 | 0.2                | 6.1                 | 0.5                | 0.4                 | 0.6                |
| 12.00                      | 1.5                       | 1.7                 | 7.9                | 8.2                 | 1.3                | 5.4                 | 0.3                | 6.1                 | 0.5                | 0.4                 | 0.6                |
| 12.00                      | 1.8                       | 1.6                 | 7.7                | 8.6                 | 1.4                | 5.6                 | 0.3                | 6.3                 | 0.5                | 0.4                 | 0.5                |
| 24.00                      | 2.9                       | 1.4                 | 6.7                | 6.9                 | 1.2                | 5.4                 | 0.3                | 5.1                 | 0.4                | 0.3                 | 0.5                |
| 30.00                      | 4.1                       | 1.5                 | 7.1                | 6.1                 | 1.1                | 6.1                 | 0.3                | 4.6                 | 0.4                | 0.3                 | 0.5                |
| 36.00                      | 5.5                       | 1.3                 | 6.4                | 5.8                 | 1.0                | 6.5                 | 0.3                | 4.8                 | 0.4                | 0.3                 | 0.4                |

  

| Kidneys             |                    | Liver               |                    | Lungs               |                    | Pancreas            |                    | Red Marrow          |                    | Spleen              |                    |
|---------------------|--------------------|---------------------|--------------------|---------------------|--------------------|---------------------|--------------------|---------------------|--------------------|---------------------|--------------------|
| animal<br>%ID/organ | human<br>%ID/organ | animal<br>%ID/organ | human<br>%ID/organ | animal<br>%ID/organ | human<br>%ID/organ | animal<br>%ID/organ | human<br>%ID/organ | animal<br>%ID/organ | human<br>%ID/organ | animal<br>%ID/organ | human<br>%ID/organ |
| 9.0                 | 3.2                | 15.8                | 12.3               | 11.7                | 3.6                | 0.5                 | 0.5                | 8.3                 | 2.5                | 1.2                 | 1.0                |
| 8.6                 | 3.1                | 12.4                | 9.6                | 8.8                 | 2.7                | 0.4                 | 0.4                | 8.8                 | 2.6                | 0.8                 | 0.7                |
| 6.6                 | 2.4                | 10.9                | 8.4                | 8.0                 | 2.5                | 0.4                 | 0.4                | 8.7                 | 2.6                | 0.8                 | 0.7                |
| 7.6                 | 2.7                | 10.1                | 7.8                | 7.5                 | 2.3                | 0.4                 | 0.4                | 8.4                 | 2.5                | 0.8                 | 0.7                |
| 7.7                 | 2.7                | 9.4                 | 7.3                | 7.2                 | 2.2                | 0.4                 | 0.4                | 8.0                 | 2.4                | 0.7                 | 0.6                |
| 7.8                 | 2.8                | 9.0                 | 7.0                | 6.9                 | 2.2                | 0.3                 | 0.3                | 7.8                 | 2.3                | 0.7                 | 0.6                |
| 7.9                 | 2.8                | 8.7                 | 6.8                | 6.8                 | 2.1                | 0.3                 | 0.3                | 7.6                 | 2.3                | 0.7                 | 0.6                |
| 7.4                 | 2.6                | 8.5                 | 6.6                | 6.2                 | 1.9                | 0.3                 | 0.3                | 6.2                 | 1.9                | 0.4                 | 0.4                |
| 6.6                 | 2.4                | 8.0                 | 6.2                | 5.6                 | 1.7                | 0.2                 | 0.2                | 6.4                 | 1.9                | 0.4                 | 0.4                |
| 6.1                 | 2.2                | 7.6                 | 5.9                | 5.5                 | 1.7                | 0.3                 | 0.3                | 6.1                 | 1.9                | 0.4                 | 0.3                |

  

| Thymus              |                    | Thyroid             |                    | ur. Bladder         |                    | Rem. of. Body       |                    |
|---------------------|--------------------|---------------------|--------------------|---------------------|--------------------|---------------------|--------------------|
| animal<br>%ID/organ | human<br>%ID/organ | animal<br>%ID/organ | human<br>%ID/organ | animal<br>%ID/organ | human<br>%ID/organ | animal<br>%ID/organ | human<br>%ID/organ |
| 0.6                 | 0.1                | 0.2                 | 0.1                | 0.3                 | 0.2                | 27.7                | 37.2               |
| 0.6                 | 0.1                | 0.2                 | 0.1                | 0.7                 | 0.5                | 35.9                | 48.4               |
| 0.6                 | 0.1                | 0.2                 | 0.1                | 1.7                 | 1.3                | 40.0                | 53.9               |
| 0.6                 | 0.1                | 0.2                 | 0.1                | 2.7                 | 2.1                | 40.0                | 53.9               |
| 0.5                 | 0.1                | 0.2                 | 0.1                | 3.6                 | 2.9                | 40.4                | 54.4               |
| 0.5                 | 0.1                | 0.2                 | 0.1                | 4.7                 | 3.8                | 39.9                | 53.6               |
| 0.5                 | 0.1                | 0.2                 | 0.1                | 5.8                 | 4.7                | 38.7                | 52.0               |
| 0.4                 | 0.1                | 0.2                 | 0.1                | 10.7                | 9.4                | 40.1                | 54.0               |
| 0.4                 | 0.1                | 0.2                 | 0.1                | 15.2                | 13.9               | 38.2                | 51.5               |
| 0.3                 | 0.1                | 0.1                 | 0.1                | 19.3                | 18.2               | 35.2                | 47.2               |

Table S2. Piglet biokinetic PET/CT based data and extrapolation to human circumstances in %ID per organ (mean %ID).



| Time [h] | Brain<br>%ID | Gallbladder<br>%ID | LLI<br>%ID | SI<br>%ID | Stomach<br>%ID | ULI<br>%ID | Myocardium<br>%ID | Kidneys<br>%ID | Liver<br>%ID | Lung<br>%ID | Pancreas<br>%ID |
|----------|--------------|--------------------|------------|-----------|----------------|------------|-------------------|----------------|--------------|-------------|-----------------|
| 0.00     | 1.1          | 0.1                | 0.3        | 5.5       | 1.0            | 0.7        | 1.3               | 6.3            | 14.3         | 12.8        | 0.4             |
| 0.25     | 7.1          | 0.1                | 0.2        | 4.1       | 1.0            | 0.5        | 0.6               | 3.2            | 21.7         | 6.8         | 0.5             |
| 0.50     | 7.3          | 0.1                | 0.2        | 3.7       | 1.0            | 0.4        | 0.5               | 2.4            | 20.9         | 6.0         | 0.5             |
| 0.75     | 7.3          | 0.1                | 0.2        | 3.5       | 0.8            | 0.4        | 0.4               | 2.0            | 19.6         | 5.6         | 0.3             |
| 1.00     | 7.2          | 0.1                | 0.2        | 3.4       | 0.6            | 0.4        | 0.4               | 1.9            | 18.3         | 5.4         | 0.2             |
| 1.32     | 7.0          | 0.1                | 0.2        | 3.0       | 0.5            | 0.3        | 0.4               | 1.7            | 17.2         | 5.1         | 0.2             |
| 1.63     | 6.8          | 0.1                | 0.1        | 2.9       | 0.5            | 0.3        | 0.4               | 1.7            | 16.1         | 4.9         | 0.2             |
| 2.92     | 6.0          | 0.2                | 0.2        | 2.4       | 1.7            | 0.4        | 0.6               | 1.7            | 12.7         | 4.1         | 0.1             |
| 4.42     | 5.4          | 0.1                | 0.1        | 2.2       | 2.7            | 0.2        | 0.8               | 1.3            | 10.6         | 3.9         | 0.1             |
| 5.92     | 5.1          | 0.2                | 0.1        | 1.7       | 2.0            | 0.2        | 0.7               | 1.2            | 11.8         | 3.2         | 0.1             |

| red marrow<br>%ID | Spleen<br>%ID | Thyroid<br>%ID | ur. Bladder<br>%ID | Rem. of Body<br>%ID |
|-------------------|---------------|----------------|--------------------|---------------------|
| 3.3               | 0.7           | 0.3            | 2.2                | 52.0                |
| 3.8               | 0.4           | 0.1            | 5.4                | 47.3                |
| 4.1               | 0.3           | 0.1            | 8.2                | 47.4                |
| 4.2               | 0.3           | 0.1            | 10.3               | 48.2                |
| 4.4               | 0.2           | 0.1            | 12.4               | 47.9                |
| 4.4               | 0.2           | 0.1            | 14.5               | 48.2                |
| 4.4               | 0.2           | 0.1            | 16.2               | 48.3                |
| 3.9               | 0.3           | 0.0            | 8.7                | 40.6                |
| 2.8               | 0.3           | 0.0            | 7.9                | 37.8                |
| 3.0               | 0.1           | 0.0            | 9.9                | 36.9                |

Table S3. Human biokinetic PET/CT based data (mean %ID).
